# Supplementary material for: Faucet: streaming de novo assembly graph construction
Source: PubMed Central journal article supplement — Bioinformatics. 2017 Jul 24;34(1):147–54. doi: 10.1093/bioinformatics/btx471 (PMC5870852; doi:10.1093/bioinformatics/btx471), 2017-07-24
Supplement: faucet_appendix_btx471.pdf [file faucet_appendix_btx471.pdf]

## Appendix

### Sizing Bloom filters

We used the tool ntCard to estimate the cardinality  $F_0$  of the set of k-mers and the number of singletons  $f_1$ . These counts are used for optimizing both runtime and memory use by allowing us to minimize the size of Bloom filters  $m$  and the number of hash functions  $h$  used for both  $B_1$  and  $B_2$ , the largest filters used.  $B_1$  and  $B_2$  share these parameters (and the same set of hash functions) to allow insertions of each  $s$  into  $B_2$  for which  $B_1(s) = 1$  without recalculating  $h$  hash values. We use the fact that elements inserted into  $B_2$  are either non-singletons or false positives due to  $B_1$ . Thus, the expected number of elements  $n_2$  in  $B_2$ , is bound by their sum, i.e.,

$$n_2 \leq (F_0 - f_1) + f_1 p_1 \quad (1)$$

where  $p_1$  is the false positive rate of  $B_1$ . We note that since  $p$  is the *effective* false positive rate after all elements are inserted into  $B_1$ , this bound holds strictly and may be overly pessimistic regarding the number of false positives inserted into  $B_2$ , however it provides a simple means of setting parameters. To do so, we first recall that  $B_1$  is discarded after loading, while  $B_2$  is maintained and thus its false positive rate  $p_2$  is the rate that affects all downstream queries. A default false positive rate of  $p_2 = 0.01$  is used to work backwards to derive a higher rate  $p_1$ , and Bloom filter parameters for both filters were set based on this derived value, using knowledge of  $F_0$  and  $f_1$ . To derive  $p_1$ , we paired the expressions for the expected false positive rates with the expression for the optimal number of hash functions for a given false positive rate (Mitzenmacher (2002)):

$$p_1 = (1 - e^{-\frac{F_0 h}{m}})^h \quad (2)$$

$$p_2 = (1 - e^{-\frac{n_2 h}{m}})^h \quad (3)$$

$$h = \frac{m \ln(2)}{F_0} \quad (4)$$

By plugging the value of  $h$  from equation 4 into equation 2, we arrive at  $m = \frac{-F \ln(p_1)}{\ln(2)^2}$ . Combining this and the above expressions, we arrive at

$$0 = -\ln(2) \ln(p_2) - \ln(p_1) \ln\left(1 - 2^{-\frac{F_0 + (1-p_1)f_1}{F_0}}\right) \quad (5)$$

for which root-finding methods can be applied to finally extract  $p_1$ , the sole remaining unknown.

Currently, we have not yet found similar means of optimizing the sizes of filters  $B_3$  and  $B_4$ , as it is unclear how to estimate the number of elements that will be inserted into them in advance. We therefore define their sizes based on empirical observations. For diverse metagenomes, where the number of singletons  $f_1$  may be very close to the cardinality  $F_0$ , we expect there to be few junctions, as a junction k-mer must by definition occur at least twice in the data. Based on this observation, we set the expected number of elements in both  $B_3$  and  $B_4$  to be  $\frac{F_0}{10}$  and found that this bound was not exceeded on tested datasets. For higher coverage data, where a significantly larger proportion of junctions is expected relative to  $F_0$ , we set the size of both filters to be  $\frac{F_0}{2}$ .

### Solid junction counts

Total junction counts listed in the Table 1 below include real junctions, those due to false positives, and dummy junctions inside long linear stretches. We posit that the SYN 64 data set included many more fake (false positive and dummy) junctions as a result of having a much larger proportion of linear stretches, as reflected in the much larger genome fraction and N50 size (relative to HMP) output by Faucet.

|                     | HMP  | SYN 64 |
|---------------------|------|--------|
| Total junctions (M) | 7.11 | 9.23   |
| Real junctions (M)  | 4.55 | 1.34   |
| genome fraction (%) | 27.9 | 82.3   |
| N50                 | 2290 | 16707  |

Table 1.

### Inserting into $B_4$

When inserting into  $B_4$ , both the distance and relative orientation between paired-end mates is unknown. Therefore, a tiling scheme such as that seen in Figure 3 cannot be applied. Instead, we seek to ensure that in most cases when querying approximately one insert size away from a given junction  $u$ , there will be another junction  $v$  such that an extension of  $u$  will be paired with an extension of  $v$  in  $B_4$ . To achieve this end, and to avoid long run times due to pair insertions, we apply the following logic: for each junction  $u$  on the first mate, we only insert extensions of a new pair  $(u, v)$  if  $u$  has no pair in  $B_4$ . When a new pair must be inserted,  $v$  is chosen to be the first junction found on the second mate. During the insertion process, this logic allows us to break the querying process whenever one previously inserted pair is encountered, and lets us avoid inserting too many pairs into  $B_4$ , and thus risking increasing  $B_4$ 's effective false positive rate.

### Additional disentanglement

Other forms of disentanglement include resolution of loops and disentanglement by coverage. Loops are encountered when, e.g.,  $s_a$  and  $s_c$  in Figure 2 are the same unitig, and disentanglement requires unwinding the loop and duplicating the  $s$ 's sequence to arrive at the walk  $[s_b, s, s_c, s, s_d]$ . Disentanglement by coverage is allowed only when  $s$  is deemed too long for there to be support by junction pairs flanking opposite ends of  $s$ , and is applied when the coverage distributions of Contig pairs supporting a certain orientation (e.g.,  $s_a$  paired with  $s_c$  and  $s_b$  with  $s_d$  for the case presented in Figure 2 is significantly similar, as determined by Two One Sided Tests (Walker and Nowacki (2011)) for each pair. To smooth coverage levels when this test is applied, coverage values are updated each time a cleaning step such as bulge removal is applied. For example, if a bubble includes one low coverage Contig  $s_1$  and one high coverage Contig  $s_2$ , as extensions flanked by the same ContigNodes  $j_L$  and  $j_R$ , and  $s_2$ 's coverage is sufficiently higher than  $s_1$ 's, Contig  $s_1$  will be removed, and its average coverage will be assigned to all (expired or fake) junctions on Contig  $s_2$ .

### Tools comparison details

Tools and flags:

Faucet was run with  $k=31$

MetaSPAdes 3.9.0, default parameters

Megahit 1.1.1, default parameters

Minia 3 Beta, git commit 4b0a83a,  $k=31$

LightAssembler, no version information available, downloaded 1/17 from GitHub  $k=31$

MetaQUAST, 4.4.0,  $-fragmented$  flag

Data Sets:

SYN 64 (SRA accession SRX200676), 109M 100 bp paired end mates, I.S. 206

HMP (SRX024329), 149.6 M 100 bp paired end mates, I.S. 213

## References

Mitzenmacher, M. (2002). Compressed Bloom filters. *IEEE/ACM Transactions on Networking*, **10**(5), 604–612.

Walker, E. and Nowacki, A. S. (2011). Understanding equivalence and noninferiority testing. *Journal of general internal medicine*, **26**(2), 192–6.
